# Supplementary material
Source: PubMed Central journal article supplement (PMC3879614)

Figure S4

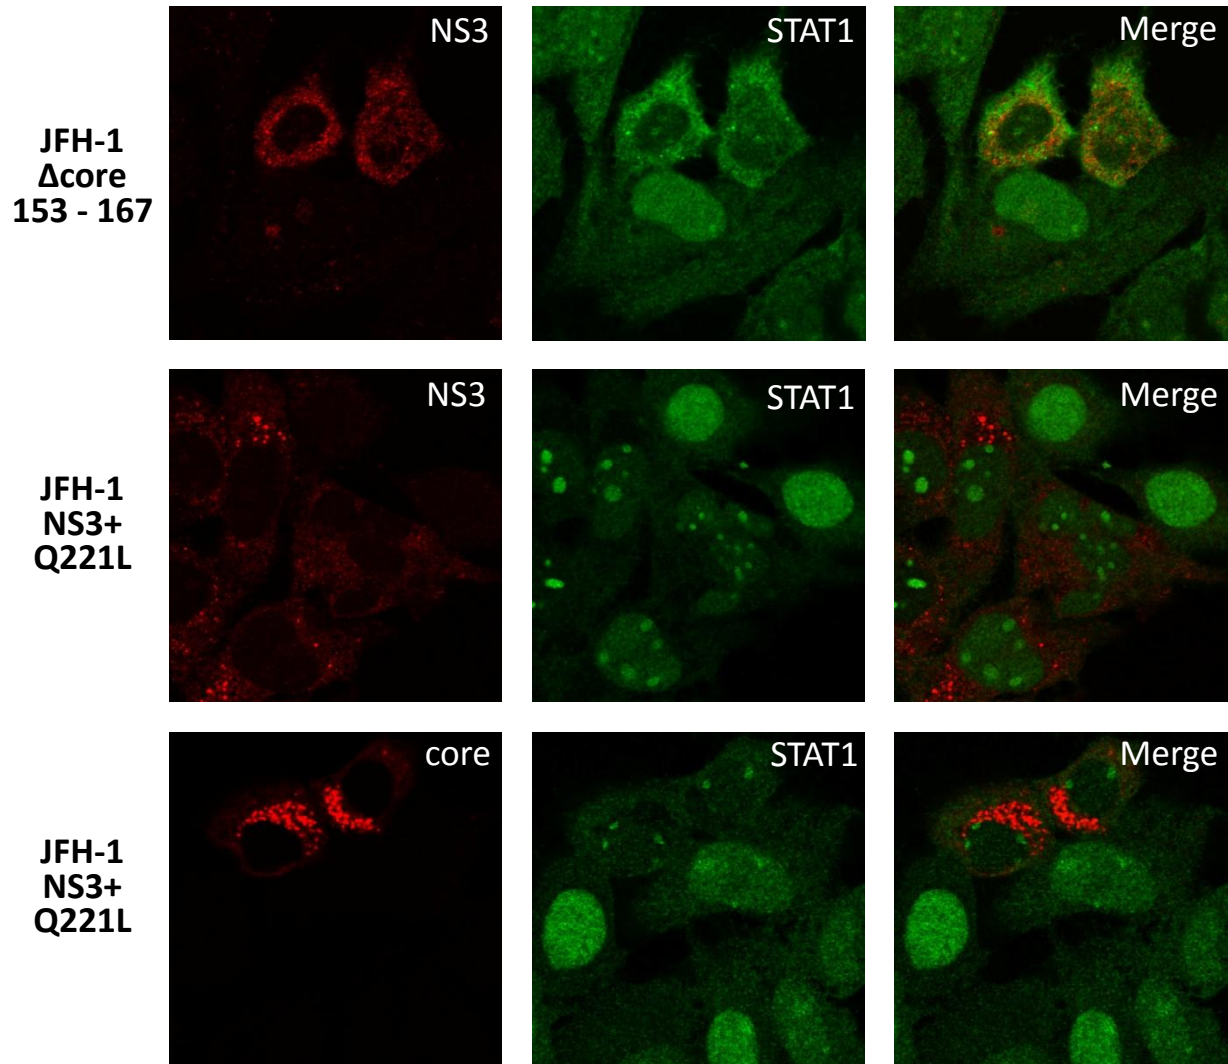

Supplement: supp_M113.030155_mcp.M113.030155-4.pdf [file supp_M113.030155_mcp.M113.030155-4.pdf]
